# Supplementary material
Source: MDPI journal article supplement (https://www.mdpi.com/2073-4441/16/1/125)
Supplement: s1 [file s1]

SUPPLEMENTARY MATERIAL

# Treatment of Antihypertensive and Cardiovascular Drugs in Supercritical Water: An Experimental and Modeled Approach

Isabela M. Dias <sup>1</sup>, Lucas C. Mourão <sup>1</sup>, Guilherme B. M. De Souza <sup>1</sup>, Jose M. Abelleira-Pereira <sup>2</sup>, Jules M. Dos Santos-Junior <sup>3</sup>, Antônio C. D. De Freitas <sup>4</sup>, Lucio Cardozo-Filho <sup>5</sup>, Christian G. Alonso <sup>1</sup> and Reginaldo Guirardello <sup>3,\*</sup>

<sup>1</sup> Instituto de Química, Universidade Federal de Goiás (UFG), Av. Esperança s/n, Campus Samambaia, Goiânia 74690-900, GO, Brazil; isabelamilhomem@ufg.br (I.M.D.); lucasclementinom@gmail.com (L.C.M.); guilherme\_botelho@ufg.br (G.B.M.D.S.); christian@ufg.br (C.G.A.)

<sup>2</sup> Department of Chemical Engineering and Food Technology, Faculty of Sciences, University of Cádiz, International Excellence Agrifood Campus (CeIA3), Puerto Real, 11510 Cádiz, Spain; jose.abelleira@uca.es

<sup>3</sup> School of Chemical Engineering, University of Campinas (UNICAMP), Av. Albert Einstein 500, Campinas 13083-852, SP, Brazil; jullesmitoura7@gmail.com

<sup>4</sup> Engineering Department, Exact Sciences and Technology Center, Federal University of Maranhão (UFMA), Av. Dos Portugueses, 1966, Bacanga, São Luís 65080-805, MA, Brazil; tonyfrt12@gmail.com

<sup>5</sup> Programa de Pós-Graduação em Engenharia Química, Universidade Estadual de Maringá (UEM), Avenida Colombo, 5790–Zona 7, Maringá 87020-900, PR, Brazil; lcfilho@uem.br

\* Correspondence: guira@unicamp.br

## Table of contents

|                                                                                            |   |
|--------------------------------------------------------------------------------------------|---|
| 1. Materials and methods.....                                                              | 3 |
| 1.1 <i>Physical-chemical characterization</i> .....                                        | 3 |
| 1.2 <i>Reference</i> .....                                                                 | 3 |
| 2. Chemical compounds in the outflow .....                                                 | 4 |
| 3. The feed operating conditions considered for thermodynamic analysis of ScW system. .... | 5 |
| 4. Results of ANOVA .....                                                                  | 6 |

## 1. Materials and methods

### 1.1 Physical-chemical characterization

Samples were characterized before and after treatment. The Standard Methods for the Examination of Water and Wastewater (Baird et al., 2017) was used as guideline.

In the liquid phase, total organic carbon analysis was performed in a carbon analyzer, model TOC-L CSH (Shimadzu) using method 5310B. As calibration standard for organic carbon, a solution of potassium phthalate (1000 mgC/L) was used, while a solution of sodium carbonate and bicarbonate (1000 mgC/L) was used for inorganic carbon. Chemical oxygen demand (COD) analyzes were performed following method 5220D. For this, a closed reflux digestion was carried out and detection performed using a colorimeter, model DR-900 produced by Hach. Biochemistry oxygen demand (BOD) analyzes followed the method 5210B, which used an optical oximeter coupled to a multiparameter meter (model HQ40D, Hach) in a BOD incubator (Tecnal). Nitrite (4500-NO<sub>2</sub>-B) and nitrate (4500-NO<sub>3</sub>-B) determination were carried out using molecular absorption spectroscopy within the UV-Vis region, utilizing a Perkin Elmer model 365 spectrophotometer. Sulfate quantification was achieved through gravimetry, following the 4500-SO<sub>4</sub>-D method. pH analysis was carried out at 25 °C using a Quimis model Q400MA pH meter. Metal analysis was performed using inductively coupled plasma optical emission spectrometry (ICP-OES), Perkin Elmer model 7300 DV instrument. A certified multi-element standard solution (1000 mg/L) from SpecSol was used for calibration, following the method 3120B. High-resolution mass spectrometry analyses were performed using an Exactive HCD Plus system equipped with an Ion Max API ionization source featuring a HESI probe (Heated Electrospray Ionization – HESI), by Thermo Scientific, Bremen, Germany. The instrument was operated in the mode of direct infusion at a flow rate of 15 µL/min. Sample solutions were prepared by diluting 5 µL of the sample into 1 mL of methanol. The analyses were performed in positive mode, with the following conditions: a spray voltage of 3.0 kV, vaporization region heating at 50 °C, capillary temperature set at 300 °C, sheath gas at 15 au, auxiliary gas at 5 au, and sweep gas at 5 au. Mass spectra were acquired within the m/z range of 150 to 800.

In the gaseous phase, determinations were performed using a gas chromatograph (GC) equipped with both a thermal conductivity detector (TCD) and a flame ionization detector (FID), specifically the Perkin Elmer Clarus 580 GC model. The separation system is composed by a packed molsieve 13X 60/80 mesh column (1.83 m x 2 mm) and a HaySep 60/80 mesh column (1.83 m x 2 mm x 3.18 mm), both supplied by Perkin Elmer. The equipment was calibrated using a certified gas mixture, provided by White Martins, consisting of the following composition (v/v): H<sub>2</sub> (50.01%), CO<sub>2</sub> (2.04%), C<sub>2</sub>H<sub>4</sub> (9.95%), C<sub>2</sub>H<sub>6</sub> (10.02%), N<sub>2</sub> (21.11%), CH<sub>4</sub> (4.86%), and CO (2.01%). Analyses were conducted at 60 °C, employing argon as the carrier gas at a constant flow rate for a duration of 15 minutes.

### 1.2 Reference

Baird, R.B., Eaton, A.D., Rice, E.W., 2017. Standard Methods for the Examination of Water and Wasterwater, 23rd ed. American Public Health Association.

## 2. Chemical compounds in the outflow

**Table S1.** Considered compounds during simulations and their thermodynamic properties (POLING et al., 2001).

| Compound          | Chemical Formula                | TC<br>(K) <sup>a</sup> | PC<br>(MPa) <sup>a</sup> | VC<br>(m <sup>3</sup> /kmol) <sup>a</sup> | $\omega$ (-) <sup>a</sup> |
|-------------------|---------------------------------|------------------------|--------------------------|-------------------------------------------|---------------------------|
| Chloroform        | CHCl <sub>3</sub>               | 536.4                  | 5.47                     | 0.024                                     | 0.218                     |
| Methanol          | CH <sub>3</sub> OH              | 512.6                  | 8.09                     | 0.012                                     | 0.556                     |
| Acetonitrile      | C <sub>2</sub> H <sub>3</sub> N | 545.5                  | 4.83                     | 0.017                                     | 0.278                     |
| Water             | H <sub>2</sub> O                | 647.3                  | 22.10                    | 0.056                                     | 0.348                     |
| Hydrogen          | H <sub>2</sub>                  | 33.0                   | 1.30                     | 0.064                                     | 0.000                     |
| Ethane            | C <sub>2</sub> H <sub>6</sub>   | 305.4                  | 4.82                     | 0.148                                     | 0.105                     |
| Propane           | C <sub>3</sub> H <sub>8</sub>   | 369.9                  | 4.20                     | 0.200                                     | 0.152                     |
| Ethylene          | C <sub>2</sub> H <sub>4</sub>   | 283.1                  | 5.05                     | 0.124                                     | 0.073                     |
| Propylene         | C <sub>3</sub> H <sub>6</sub>   | 369.9                  | 4.54                     | 0.182                                     | 0.143                     |
| Carbon monoxide   | CO                              | 133.0                  | 3.50                     | 0.093                                     | 0.041                     |
| Carbon dioxide    | CO <sub>2</sub>                 | 304.2                  | 7.39                     | 0.094                                     | 0.420                     |
| Methane           | CH <sub>4</sub>                 | 191.1                  | 4.58                     | 0.099                                     | 0.013                     |
| Ammonia           | NH <sub>3</sub>                 | 405.6                  | 11.35                    | 0.072                                     | 0.250                     |
| Nitric oxide      | NO                              | 180.0                  | 6.48                     | 0.058                                     | 0.607                     |
| Nitrogen dioxide  | NO <sub>2</sub>                 | 431.0                  | 10.10                    | 0.169                                     | 0.860                     |
| Nitrogen          | N <sub>2</sub>                  | 126.2                  | 3.39                     | 0.086                                     | 0.040                     |
| Hydrogen chloride | HCl                             | 324.7                  | 8.31                     | 0.081                                     | 0.133                     |
| Chlorine          | Cl <sub>2</sub>                 | 416.9                  | 7.99                     | 0.124                                     | 0.090                     |
| Hydrogen peroxide | H <sub>2</sub> O <sub>2</sub>   | 728.0                  | 22.00                    | 0.073                                     | 0.359                     |
| Hydrogen sulfide  | H <sub>2</sub> S                | 373.2                  | 8.94                     | 0.099                                     | 0.081                     |
| Sulfuric acid     | H <sub>2</sub> SO <sub>4</sub>  | 590.8                  | 12.94                    | 0.200                                     | 1.916                     |
| Sulfur oxide      | SO <sub>2</sub>                 | 430.8                  | 7.88                     | 0.122                                     | 0.256                     |
| Sulfur trioxide   | SO <sub>3</sub>                 | 490.9                  | 8.21                     | 0.127                                     | 0.481                     |

### 3. The feed operating conditions considered for thermodynamic analysis of SCW system.

**Table S2.** Operational conditions used in the SCW thermodynamic analysis via Gibbs energy minimization [30].

| Variable                  |                      | Minimum | Maximum | Unit |
|---------------------------|----------------------|---------|---------|------|
| Atenolol                  | $C_{14}H_{22}N_2O_3$ | 5       | 20      | % wt |
| Captopril                 | $C_9H_{15}NO_3S$     | 5       | 20      | % wt |
| Propranolol hydrochloride | $C_{16}H_{21}NO_2$   | 5       | 20      | % wt |
| Trimetazidine             | $C_{14}H_{22}N_2O_3$ | 5       | 20      | % wt |
| Diosmin                   | $C_{28}H_{32}O_{15}$ | 5       | 20      | % wt |
| Hesperidin                | $C_{28}H_{34}O_{15}$ | 5       | 20      | % wt |
| Losartan potassium        | $C_{22}H_{23}ClN_6O$ | 5       | 20      | % wt |
| Hydrochlorothiazide       | $C_7H_8N_3ClO_4S_2$  | 5       | 20      | % wt |
| Hydrogen peroxide         | $H_2O_2$             | 10      | 10      | % wt |
| Water                     | $H_2O$               | 70      | 85      | % wt |
| Temperature               | T                    | 77      | 527     | ° C  |
| Pressure                  | P                    | 30      | 230     | bar  |

#### 4. Results of ANOVA

**Table S3.** Results of ANOVA table

| Factor         | Df | Sum Sq | Mean Sq | F valor | p-value               |
|----------------|----|--------|---------|---------|-----------------------|
| First-order    | 3  | 8710.4 | 2903.46 | 15.548  | $1.89 \times 10^{-4}$ |
| Pure quadratic | 3  | 3881.5 | 1293.86 | 6.928   | 0.0069                |
| Lack-of-fit    | 8  | 2046.2 | 255.77  | 96.757  | 0.0015                |
| Pure Error     | 3  | 7.9    | 2.64    |         |                       |
| Total SS       | 11 | 2054.1 | 186.74  |         |                       |

Multiple R-squared: 0.8597,      Adjusted R-squared: 0.7832,      MS residual = 2055.13
